# Supplementary material for: Highly stable semitransparent solar cell employing graphene/WS2/LaVO3 vertical-heterostructure
Source: Royal Society of Chemistry journal article supplement (doi:10.1039/d3tc03411a), 2024-01-01
Supplement: d3tc03411a1.pdf [file d3tc03411a1.pdf]

## Supporting Information

for

### Highly stable semitransparent solar cell employing graphene/WS<sub>2</sub>/LaVO<sub>3</sub> vertical-heterostructure

Da Hee Kim<sup>1,2†</sup>, Dong Hee Shin<sup>3†</sup>, Dae Ho Jung<sup>1,4</sup>, Si Duck Oh<sup>5</sup>, Eun Ji Kim<sup>1,2</sup>, and Hosun  
Lee<sup>1,2,4\*</sup>

<sup>1</sup>Department of Applied Physics, Kyung Hee University, Yongin 17104, Republic of Korea

<sup>2</sup>Education Institute for Frontier Science and Technology (BK21 Four), Kyung Hee University, Yongin 17104, Republic of Korea

<sup>3</sup>Department of Smart Sensors Engineering, Andong National University, Andong, Gyeongbuk, 36729, Republic of Korea

<sup>4</sup>Institute of Natural Sciences, Kyung Hee University, Yongin 17104, Republic of Korea

<sup>5</sup>Smart Energy and Nano Photonics R&D Group, Korea Institute of Industrial Technology (KITECH), Gwangju, 61012, Republic of Korea

---

<sup>†</sup>These two authors have contributed equally to this study.

\*Corresponding author: [hlee@khu.ac.kr](mailto:hlee@khu.ac.kr)

**Table S1.** Photovoltaic parameters of pristine-Gr/WS<sub>2</sub>/LaVO<sub>3</sub> device as a function of  $t$ .

| $t$<br>(nm) | V <sub>oc</sub><br>(V) | J <sub>sc</sub><br>(mA/cm <sup>2</sup> ) | FF<br>(%) | PCE<br>(%) | Integrated J <sub>sc</sub><br>(mA/cm <sup>2</sup> ) |
|-------------|------------------------|------------------------------------------|-----------|------------|-----------------------------------------------------|
| 70          | 0.41                   | 4.89                                     | 55.87     | 1.12       | 4.80                                                |
| 150         | 0.40                   | 9.89                                     | 54.86     | 2.17       | 9.55                                                |
| 200         | 0.39                   | 12.39                                    | 53.71     | 2.59       | 11.96                                               |
| 300         | 0.38                   | 14.21                                    | 52.87     | 2.85       | 13.71                                               |

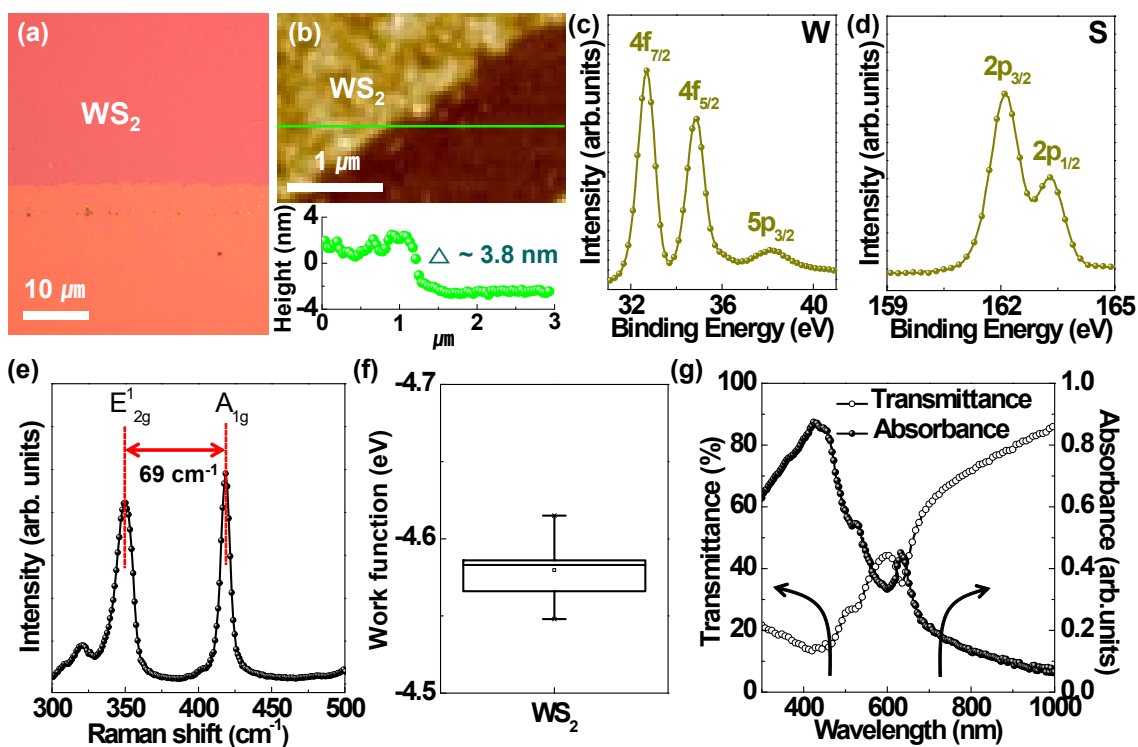

Fig. S1. (a) Optical image, (b) AFM topographic image/height profile, (c)-(d) XPS spectra, (e) Raman spectra, (f) work functions, and (g) transmittance/ absorbance spectra of WS<sub>2</sub> films.

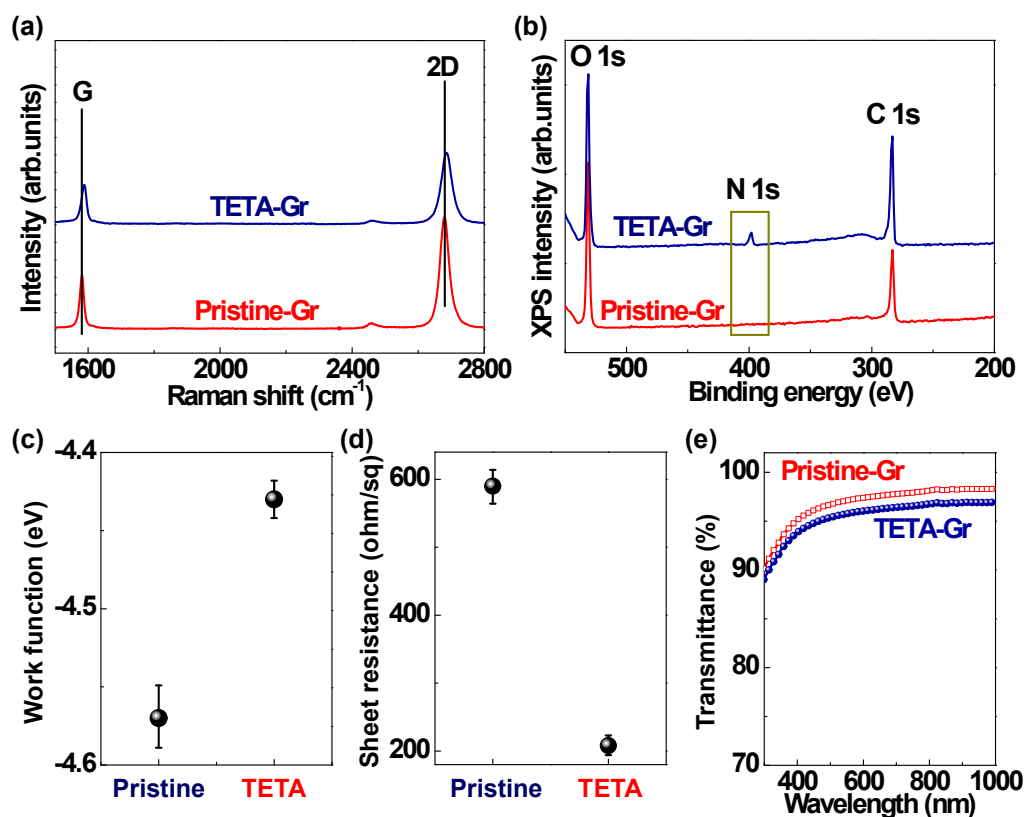

Fig. S2. (a) Raman spectra, (b) XPS spectra, (c) Work functions, (d) sheet resistance, and (e) transmittance of pristine-Gr and TETA-Gr.

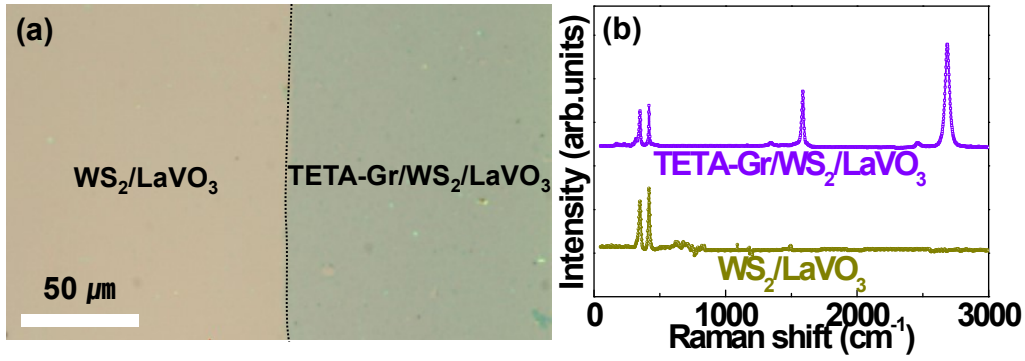

**Fig. S3.** (a) Optical image of  $\text{WS}_2/\text{LaVO}_3$  partially covered with TETA-Gr sheet, indicating the uniformly-transfer of TETA-Gr on  $\text{WS}_2/\text{LaVO}_3$ . (b) Raman spectra for the regions of  $\text{WS}_2/\text{LaVO}_3$  and TETA-Gr/ $\text{WS}_2/\text{LaVO}_3$ .

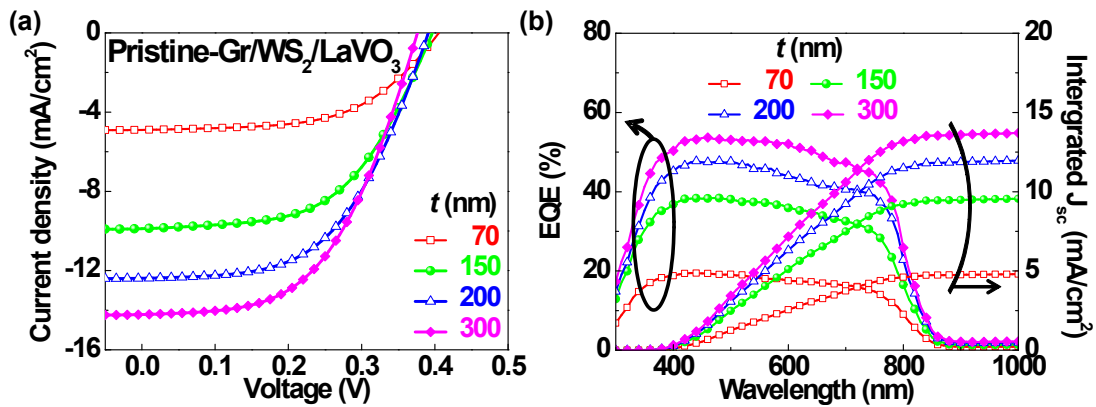

**Fig. S4.**  $J$ - $V$  behaviors under 1sun illumination and (b) EQE spectra/integrated  $J_{sc}$  of pristine-Gr/ $\text{WS}_2/\text{LaVO}_3$  solar cells for different  $t$ .

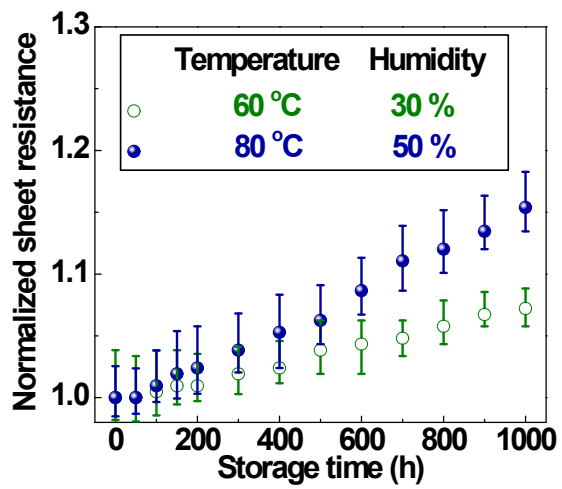

Fig. S5. Normalized changes of sheet resistance as functions of light soaking time for 60 °C temperature ( $T_a$ )/30% relative-humidity (RH) and 80 °C  $T_a$ /50% RH.
